# Supplementary material for: Development and Preliminary Validation of a Stroke Physical Activity Questionnaire
Source: Hindawi journal article supplement (doi:10.1155/2019/6764834), 2019-07-25
Supplement: f1 [file 6764834.f1.zip]

## Supplementary materials

### Stroke Physical Activity Questionnaire (SPAQ)

This questionnaire asks about the time you spent doing mild, moderate, and/or vigorous activity in the last 7 days. Physical activities requiring muscular movement in your daily activities include physical work, household chores, commuting (by walking/running/cycling), or exercise. Please estimate the time and frequency doing each activity.

| Type of physical activity                                                                                                                    | Frequency and duration                                                                                                                                                                                       | Average time per week (min) |
|----------------------------------------------------------------------------------------------------------------------------------------------|--------------------------------------------------------------------------------------------------------------------------------------------------------------------------------------------------------------|-----------------------------|
| <b>1. Low physical activities (activities that take minimal physical effort during which you could breathe normally or be able to sing.)</b> |                                                                                                                                                                                                              |                             |
| 1.1 Daily living activities (e.g., grooming, bathing, dressing)                                                                              | Duration: ..... hours.....min/day                                                                                                                                                                            |                             |
| 1.2 Light housework (e.g., cleaning house, sweeping, dish washing, tidying, washing clothes)                                                 | <input type="checkbox"/> No<br><input type="checkbox"/> Every day:<br>Duration: ..... hours.....min/day<br><input type="checkbox"/> Other:<br>Frequency: .....days/week<br>Duration: ..... hours.....min/day |                             |
| 1.3 Light gardening (i.e., trimming trees and watering)                                                                                      | <input type="checkbox"/> No<br><input type="checkbox"/> Every day:<br>Duration: ..... hours.....min/day<br><input type="checkbox"/> Other:<br>Frequency: .....days/week<br>Duration: ..... hours.....min/day |                             |
| 1.4 Grocery shopping                                                                                                                         | <input type="checkbox"/> No<br><input type="checkbox"/> Every day:<br>Duration: ..... hours.....min/day<br><input type="checkbox"/> Other:<br>Frequency: .....days/week<br>Duration: ..... hours.....min/day |                             |
| 1.5 Range of motion and flexibility exercise                                                                                                 | <input type="checkbox"/> No<br><input type="checkbox"/> Every day:<br>Duration: ..... hours.....min/day<br><input type="checkbox"/> Other:<br>Frequency: .....days/week<br>Duration: ..... hours.....min/day |                             |
| 1.6 Leisurely walking                                                                                                                        | <input type="checkbox"/> No<br><input type="checkbox"/> Every day:<br>Duration: ..... hours.....min/day<br><input type="checkbox"/> Other:<br>Frequency: .....days/week<br>Duration: ..... hours.....min/day |                             |
| 1.7 Leisurely cycling                                                                                                                        | <input type="checkbox"/> No<br><input type="checkbox"/> Every day:                                                                                                                                           |                             |

|                                                                                                                                                                                           |                                                                                                                                                                                                              |  |
|-------------------------------------------------------------------------------------------------------------------------------------------------------------------------------------------|--------------------------------------------------------------------------------------------------------------------------------------------------------------------------------------------------------------|--|
|                                                                                                                                                                                           | Duration: ..... hours.....min/day<br><input type="checkbox"/> Other:<br>Frequency: .....days/week<br>Duration: ..... hours.....min/day                                                                       |  |
|                                                                                                                                                                                           | Total time in low physical activities                                                                                                                                                                        |  |
| <b>2. Moderate physical activities (activities that require moderate physical effort and you are breathing harder and faster than normal. You can talk in sentences but cannot sing.)</b> |                                                                                                                                                                                                              |  |
| 2.1 Walking up and down stairs                                                                                                                                                            | <input type="checkbox"/> No<br><input type="checkbox"/> Every day:<br>Duration: ..... hours.....min/day<br><input type="checkbox"/> Other:<br>Frequency: .....days/week<br>Duration: ..... hours.....min/day |  |
| 2.2 Brisk walking                                                                                                                                                                         | <input type="checkbox"/> No<br><input type="checkbox"/> Every day:<br>Duration: ..... hours.....min/day<br><input type="checkbox"/> Other:<br>Frequency: .....days/week<br>Duration: ..... hours.....min/day |  |
| 2.3 Moderate intensity aerobic exercise (i.e., cycling for exercise or others (describe).....)                                                                                            | <input type="checkbox"/> No<br><input type="checkbox"/> Every day:<br>Duration: ..... hours.....min/day<br><input type="checkbox"/> Other:<br>Frequency: .....days/week<br>Duration: ..... hours.....min/day |  |
|                                                                                                                                                                                           | Total time in moderate physical activities                                                                                                                                                                   |  |
| <b>3. Vigorous physical activities (activities that take hard physical effort. You are breathing deeper and harder. You can speak 2 or 3 words but cannot speak in sentences.)</b>        |                                                                                                                                                                                                              |  |
| 3.1 Strengthening exercise (i.e., weight-lifting or resistance exercise)                                                                                                                  | <input type="checkbox"/> No<br><input type="checkbox"/> Every day:<br>Duration: ..... hours.....min/day<br><input type="checkbox"/> Other:<br>Frequency: .....days/week<br>Duration: ..... hours.....min/day |  |
| 3.2 High intensity exercise (i.e., running, aerobic dancing, or other high intensity exercise (describe).....)                                                                            | <input type="checkbox"/> No<br><input type="checkbox"/> Every day:<br>Duration: ..... hours.....min/day<br><input type="checkbox"/> Other:<br>Frequency: .....days/week<br>Duration: ..... hours.....min/day |  |
|                                                                                                                                                                                           | Total time in vigorous physical activities                                                                                                                                                                   |  |
