# Supplementary material for: Development and Preliminary Validation of a Stroke Physical Activity Questionnaire
Source: Hindawi journal article supplement (doi:10.1155/2019/6764834), 2019-07-25
Supplement: f1 [file 6764834.f1.zip]

## แบบประเมินกิจกรรมทางกายในผู้ป่วยโรคหลอดเลือดสมอง (SPAQ)

**คำชี้แจง :** แบบประเมินนี้ เป็นการสอบถามเกี่ยวกับเวลาที่ใช้ในการเคลื่อนไหวร่างกายใน 7 วันที่ผ่านมา เป็นการเคลื่อนไหวร่างกายในการทำกิจกรรมต่างๆทั้งหมดในแต่ละวัน เช่นขณะทำงาน ขณะอยู่บ้าน ขณะเดินทาง ขณะใช้เวลารว่าง และออกกำลังกาย หรือเล่นกีฬา เป็นต้น โดยจะขอให้ท่านประเมินความถี่และระยะเวลาในการทำกิจกรรมนั้น

| รายละเอียดของกิจกรรม                                                                                                                                        | ระยะเวลา                                                                                                                                                                                                       | ระยะเวลาเฉลี่ยต่อสัปดาห์ (นาที) |
|-------------------------------------------------------------------------------------------------------------------------------------------------------------|----------------------------------------------------------------------------------------------------------------------------------------------------------------------------------------------------------------|---------------------------------|
| <b>1. กิจกรรมระดับเบา</b> (กิจกรรมที่ใช้การออกกำลังกายน้อยทำให้ระดับการหายใจปกติระหว่างทำกิจกรรมนั้น สามารถพูดได้เป็นประโยคหรือร้องเพลงระหว่างทำกิจกรรมได้) |                                                                                                                                                                                                                |                                 |
| 1.1 การดูแลตนเองในการทำกิจวัตรประจำวัน ได้แก่ การล้างหน้า แปรงฟัน โกนหนวด การอาบน้ำ แต่งตัว เป็นต้น                                                         | วันละ ..... ชั่วโมง.....นาที                                                                                                                                                                                   |                                 |
| 1.2 การดูแลทำความสะอาดบ้าน การกวาดถูบ้าน การล้างจาน การจัดข้าวของในบ้าน การซักเสื้อผ้า                                                                      | <input type="checkbox"/> ไม่ได้ทำ<br><input type="checkbox"/> ทุกวัน วันละ .....ชั่วโมง.....นาที<br><input type="checkbox"/> อื่นๆ<br><br>ความถี่: .....วันต่อสัปดาห์<br>ระยะเวลา: วันละ..... ชั่วโมง.....นาที |                                 |
| 1.3 การทำสวน เช่น การตัดเล็มต้นไม้ การรดน้ำต้นไม้                                                                                                           | <input type="checkbox"/> ไม่ได้ทำ<br><input type="checkbox"/> ทุกวัน วันละ .....ชั่วโมง.....นาที<br><input type="checkbox"/> อื่นๆ<br><br>ความถี่: .....วันต่อสัปดาห์<br>ระยะเวลา: วันละ..... ชั่วโมง.....นาที |                                 |
| 1.4 การเดินซื้อของ จ่ายตลาด                                                                                                                                 | <input type="checkbox"/> ไม่ได้ทำ<br><input type="checkbox"/> ทุกวัน วันละ .....ชั่วโมง.....นาที                                                                                                               |                                 |

|                                                                                                                                                            |                                                                                                                                                                                                                              |  |
|------------------------------------------------------------------------------------------------------------------------------------------------------------|------------------------------------------------------------------------------------------------------------------------------------------------------------------------------------------------------------------------------|--|
|                                                                                                                                                            | <input type="checkbox"/> อื่นๆ<br><br>ความถี่: .....วันต่อสัปดาห์<br><br>ระยะเวลา: วันละ..... ชั่วโมง.....นาที่                                                                                                              |  |
| 1.5 การออกกำลังกายเพื่อเพิ่มพิสัยข้อหรือความยืดหยุ่นของกล้ามเนื้อ                                                                                          | <input type="checkbox"/> ไม่ได้ทำ<br><br><input type="checkbox"/> ทุกวัน วันละ .....ชั่วโมง.....นาที่<br><br><input type="checkbox"/> อื่นๆ<br><br>ความถี่: .....วันต่อสัปดาห์<br><br>ระยะเวลา: วันละ..... ชั่วโมง.....นาที่ |  |
| 1.6 การเดินเล่นและการเดินออกกำลังกายในบ้าน                                                                                                                 | <input type="checkbox"/> ไม่ได้ทำ<br><br><input type="checkbox"/> ทุกวัน วันละ .....ชั่วโมง.....นาที่<br><br><input type="checkbox"/> อื่นๆ<br><br>ความถี่: .....วันต่อสัปดาห์<br><br>ระยะเวลา: วันละ..... ชั่วโมง.....นาที่ |  |
| 1.7 การปั่นจักรยานเล่นเพื่อความเพลิดเพลิน                                                                                                                  | <input type="checkbox"/> ไม่ได้ทำ<br><br><input type="checkbox"/> ทุกวัน วันละ .....ชั่วโมง.....นาที่<br><br><input type="checkbox"/> อื่นๆ<br><br>ความถี่: .....วันต่อสัปดาห์<br><br>ระยะเวลา: วันละ..... ชั่วโมง.....นาที่ |  |
|                                                                                                                                                            | ระยะเวลาโดยรวมของกิจกรรมระดับเบา                                                                                                                                                                                             |  |
| <b>2. กิจกรรมระดับปานกลาง</b> (กิจกรรมที่ใช้กำลังกายปานกลาง ทำให้มีระดับการหายใจค่อนข้างเร็วระหว่างทำกิจกรรมสามารถพูดได้เป็นประโยคแต่ไม่สามารถร้องเพลงได้) |                                                                                                                                                                                                                              |  |
| 2.1 การเดินขึ้นลงบันได                                                                                                                                     | <input type="checkbox"/> ไม่ได้ทำ                                                                                                                                                                                            |  |

|                                                                                                                                                                              |                                                                                                                                                                                                            |  |
|------------------------------------------------------------------------------------------------------------------------------------------------------------------------------|------------------------------------------------------------------------------------------------------------------------------------------------------------------------------------------------------------|--|
|                                                                                                                                                                              | <input type="checkbox"/> ทุกวัน วันละ .....ชั่วโมง.....นาที<br><input type="checkbox"/> อื่นๆ<br>ความถี่: .....วันต่อสัปดาห์<br>ระยะเวลา: วันละ..... ชั่วโมง.....นาที                                      |  |
| 2.2 การออกกำลังกายโดยการเดินเร็วๆ                                                                                                                                            | <input type="checkbox"/> ไม่ได้ทำ<br><input type="checkbox"/> ทุกวัน วันละ .....ชั่วโมง.....นาที<br><input type="checkbox"/> อื่นๆ<br>ความถี่: .....วันต่อสัปดาห์<br>ระยะเวลา: วันละ..... ชั่วโมง.....นาที |  |
| 2.3 การปั่นจักรยานเพื่อการออกกำลังกาย และการรำกระบอง หรือการออกกำลังกาย<br>อย่างอื่นที่มีความหนักปานกลาง<br>(ระบุ).....                                                      | <input type="checkbox"/> ไม่ได้ทำ<br><input type="checkbox"/> ทุกวัน วันละ .....ชั่วโมง.....นาที<br><input type="checkbox"/> อื่นๆ<br>ความถี่: .....วันต่อสัปดาห์<br>ระยะเวลา: วันละ..... ชั่วโมง.....นาที |  |
|                                                                                                                                                                              | ระยะเวลาโดยรวมของกิจกรรมระดับปานกลาง                                                                                                                                                                       |  |
| <b>3. กิจกรรมระดับหนัก</b> (กิจกรรมที่ใช้การออกกำลังกายมาก ทำให้ระดับการหายใจลึกและเร็ว สามารถพูดได้เพียงคำสั้นๆ 2-3 คำ<br>ปนกับการหยุดพักหายใจแต่ไม่สามารถพูดเป็นประโยคได้) |                                                                                                                                                                                                            |  |
| 3.1 การออกกำลังกายเพื่อเพิ่มความแข็งแรง<br>ของกล้ามเนื้อ เช่นการยกน้ำหนัก, การถ่วง<br>น้ำหนักที่แขนหรือขาแล้วออกแรงต้าน                                                      | <input type="checkbox"/> ไม่ได้ทำ<br><input type="checkbox"/> ทุกวัน วันละ .....ชั่วโมง.....นาที<br><input type="checkbox"/> อื่นๆ<br>ความถี่: .....วันต่อสัปดาห์<br>ระยะเวลา: วันละ..... ชั่วโมง.....นาที |  |

|                                                                                                                                   |                                                                                                                                                                                                                                   |  |
|-----------------------------------------------------------------------------------------------------------------------------------|-----------------------------------------------------------------------------------------------------------------------------------------------------------------------------------------------------------------------------------|--|
| <p>3.2 การออกกำลังกายแอโรบิคแบบหนัก<br/>เช่น การวิ่ง การเต้นแอโรบิค หรือการออกกำลังกายอย่างอื่นที่มีระดับหนัก<br/>(ระบุ).....</p> | <p><input type="checkbox"/> ไม่ได้ทำ</p> <p><input type="checkbox"/> ทุกวัน วันละ .....ชั่วโมง.....นาที</p> <p><input type="checkbox"/> อื่นๆ</p> <p>ความถี่: .....วันต่อสัปดาห์</p> <p>ระยะเวลา: วันละ..... ชั่วโมง.....นาที</p> |  |
|                                                                                                                                   | <p>ระยะเวลาโดยรวมของกิจกรรมระดับหนัก</p>                                                                                                                                                                                          |  |
