# Supplementary material for: Development and Preliminary Validation of a Stroke Physical Activity Questionnaire
Source: Stroke Res Treat. 2019 Jul 25;2019:6764834. doi: 10.1155/2019/6764834 (PMC6683788; doi:10.1155/2019/6764834)
Supplement: Supplementary Materials — Supplementary material 1: Stroke Physical Activity Questionnaire Thai version. Supplementary material 2: Stroke Physical Activity Questionnaire English version. [file 6764834.f1.zip]

Archive with 2 entries (2 files):
- Supplementary material 2 Stroke Physical Activity Questionnaire English version.pdf
- Supplementary material 2 Stroke Physical Activity Questionnaire Thai version.pdf
